# Supplementary material
Source: PubMed Central journal article supplement (PMC7227077)

### **Supplemental figure legends:**

**Supplemental figure 1. Nox1 is expressed in isolated pancreatic acini.** The expression of Nox enzymes Nox 1-4 in isolated mouse pancreatic acini was studied using RT-PCR. PCR products yielded bands of the expected size. Mouse dsDNA mix from Genecopoeia was used as positive control. PCR products yielded bands of the expected size (Nox1: 127 bp; Nox2: 198 bp; Nox3:184 bp; Nox4: 147 bp). n: 3.

**Supplemental figure 2: RT-PCR analysis of expression of Nox1.** The expression of Nox1 mRNA in pancreas from WT and Nox1 KO mice was studied using RT-PCR. Total RNA was obtained from pancreas. The expression of Nox1 was seen only in WT mice. 18S rRNA was used as a housekeeping gene. RT-PCR products yielded bands of the expected size (Nox1: 127 bp; 18S rRNA 150 pb).

**Supplemental figure 3: The lack of Nox1 does not affect either caerulein-induced amylase secretion (A) or trypsin activation (B).** Results shown are means  $\pm$  SE, n=5. \* p<0.05 vs control WT.

**Supplemental figure 4: The absence of Nox1 does not affect the histological feature characteristics of AP. A:** Pancreas weight/body weight (PW/BW) ratio is slightly increased in both WT and Nox1 KO mice with AP. **B:** Representative hematoxylin and eosin (H&E)-stained sections (total magnification: 400x) show intracellular vacuoles and inflammatory infiltration (arrows) in pancreas from caerulein-treated WT mice and Nox1 KO mice. n: WT: 8; WT w/AP: 4; Nox1 KO: 8; Nox1 KO w/AP: 4.

**Supplemental figure 5: The lack of Nox1 does not affect the increase in water content or serum digestive enzymes induced by AP.** Graphic representation of pancreatic water content (%), serum amylase levels (U/L) and pancreatic lipase (U/L). Results: means  $\pm$  SE, \* p<0.05 vs control WT; n: 5.

**Supplemental figure 6: Nox1 does not mediate AP-induced phosphorylation of AKT.** p-AKT was visualized using DAB as a chromogen (color: brown). The staining displayed a cytoplasmic localization of p-AKT in pancreatic acini from both WT and Nox1 KO mice with AP. Total magnification: 400X.

**Supplemental figure 7: Left: Nox1, Nox3 and Nox4 are expressed in PaSCs. Right: Nox2 is expressed in peritoneal macrophages.** The expression of the Nox enzymes in mouse PaSCs and peritoneal macrophages was assessed by RT-PCR. Two Nox1 primers (one previously published [1] and another from Genecopoeia) were used to confirm the lack of Nox1 expression in peritoneal macrophages. PCR products yielded bands of the expected size (Nox1: 127 bp, Nox2: 198 bp, Nox3:184 bp and Nox4: 147 bp).

**Supplemental Figure 8. Caerulein does not cause ROS generation in isolated pancreatic acini.** Intracellular ROS levels were tested using fluorescence by the H<sub>2</sub>DCFDA fluorescent probe. (mean  $\pm$ SE). n: 3 experiments.

### **Reference:**

1. Singla, B., et al., *PKCdelta-Mediated Nox2 Activation Promotes Fluid-Phase Pinocytosis of Antigens by Immature Dendritic Cells*. Front Immunol, 2018. **9**: p. 537.

Supplemental figure 1

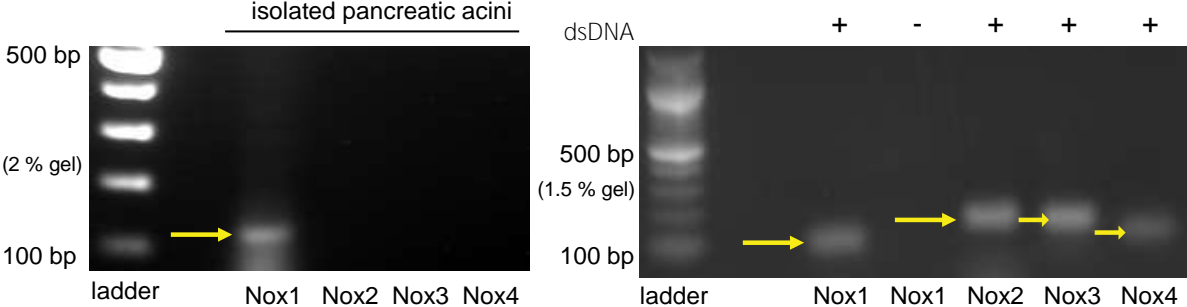

Supplemental figure 2

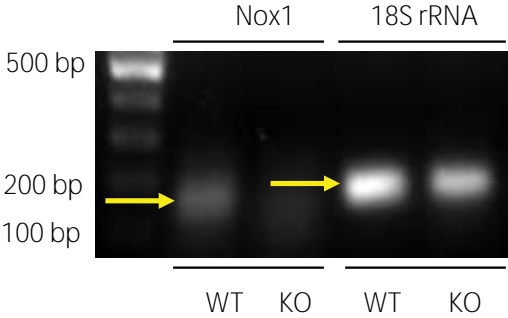

Supplemental figure 3

A)

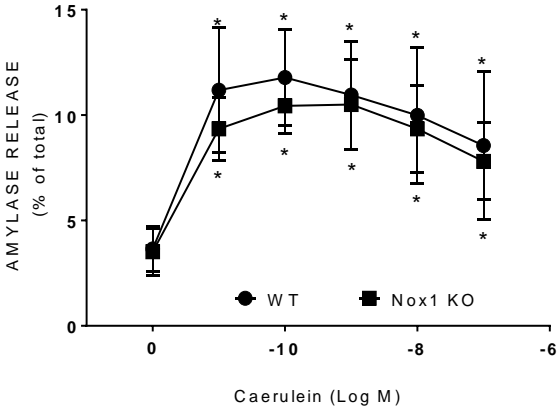

B)

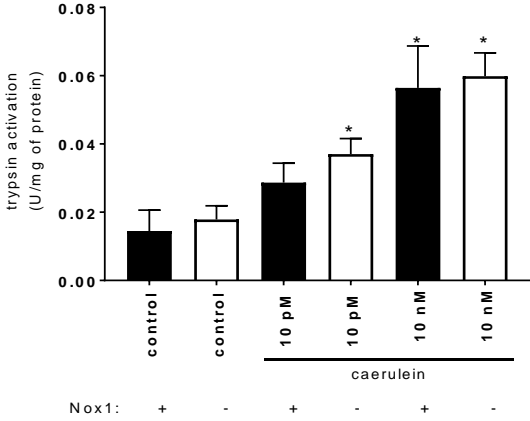

Supplemental figure 4

A)

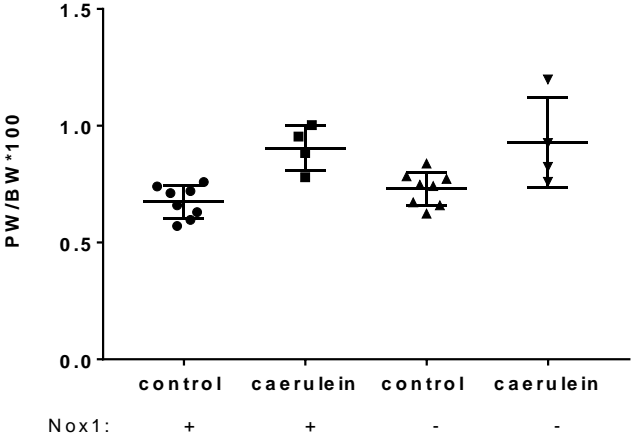

B)

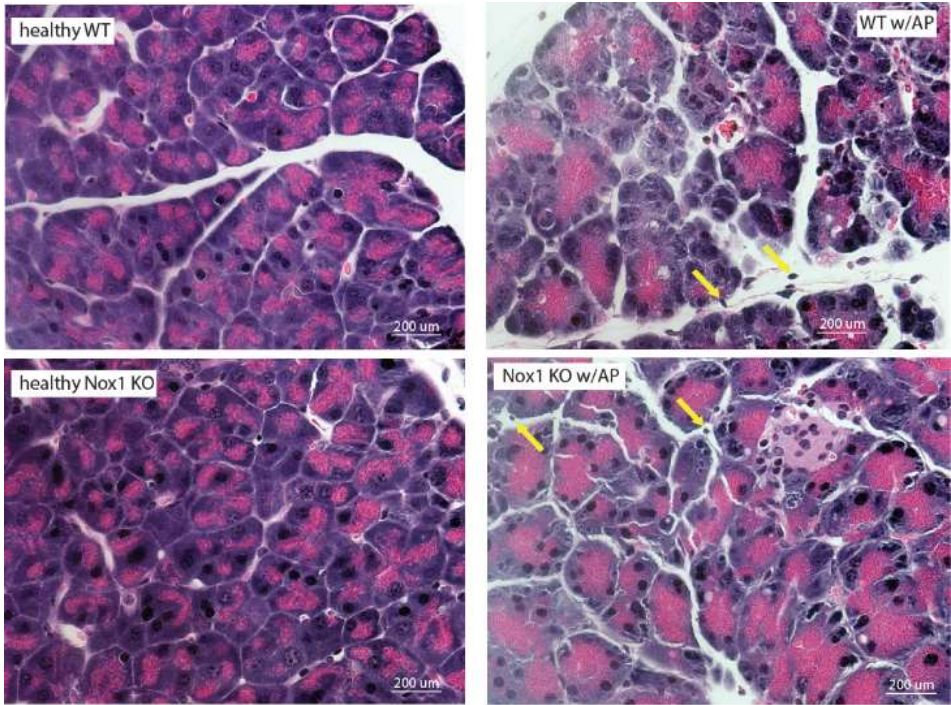

# Supplemental figure 5

A)

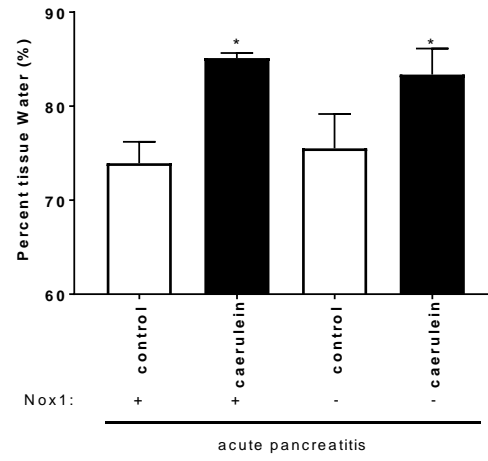

B)

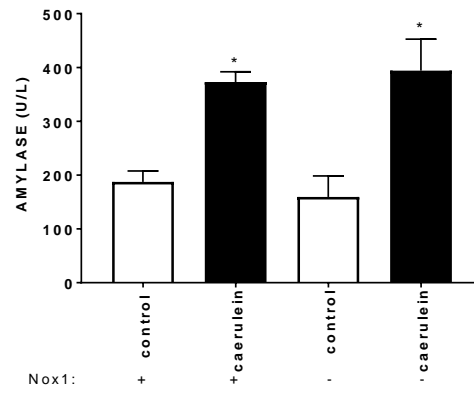

C)

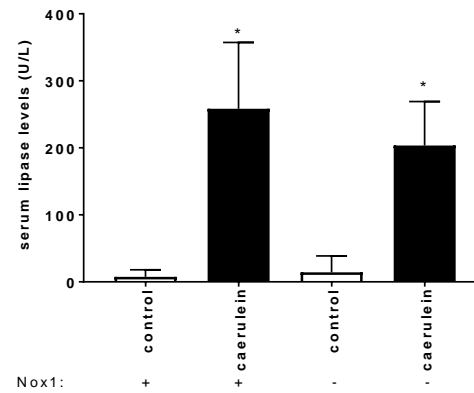

Supplemental figure 6

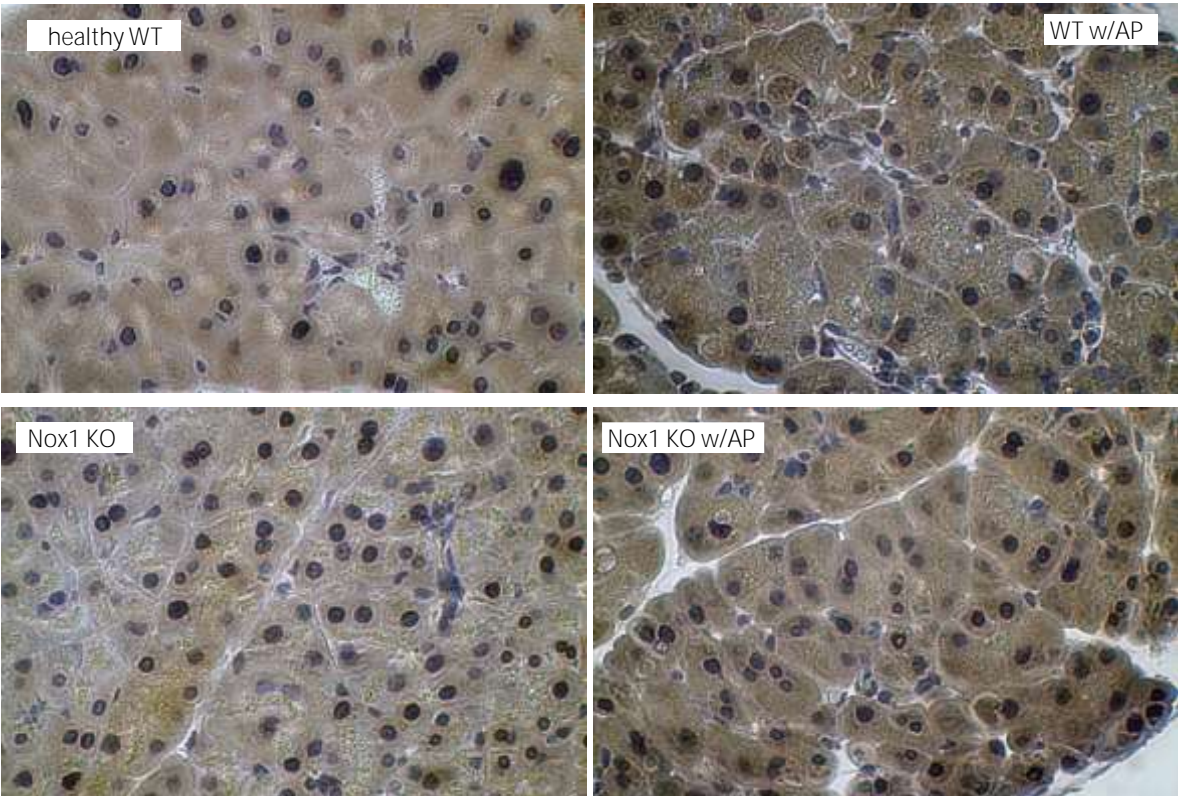

Supplemental figure 7

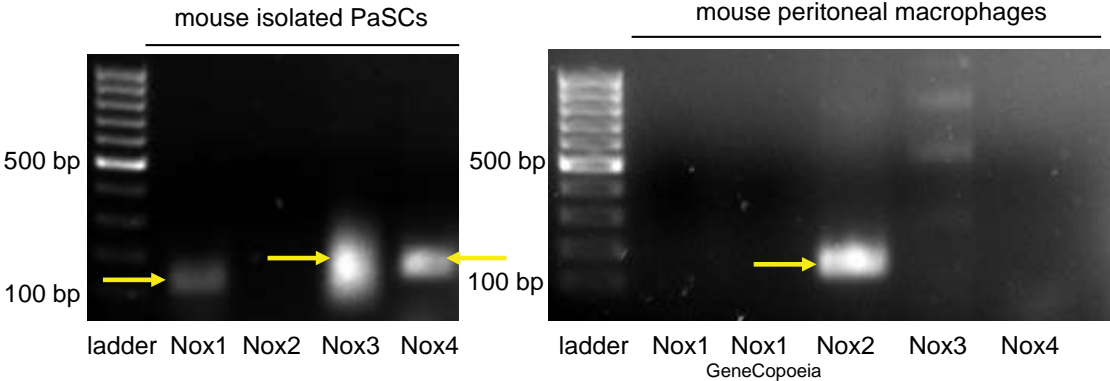



Supplemental figure 8

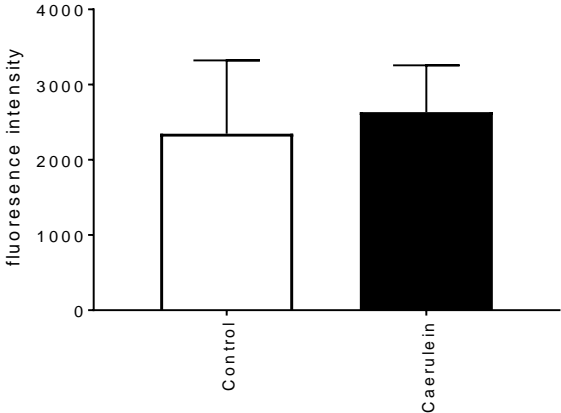

Supplement: NIHMS1580559-supplement-Supplementary_Data.pdf [file NIHMS1580559-supplement-Supplementary_Data.pdf]
